# Supplementary material for: The effect of interventions anticipated to improve plantar intrinsic foot muscle strength on fall-related dynamic function in adults: a systematic review
Source: J Foot Ankle Res. 2022 Jan 20;15:3. doi: 10.1186/s13047-021-00509-0 (PMC8772142; doi:10.1186/s13047-021-00509-0)
Supplement: Supplementary file 3 — Additional file 3. Data set and data analysis upon which the reported findings are based. [file 13047_2021_509_MOESM3_ESM.xlsx]

## Sheet: Extracted data
							Intervention group (IG)											Control group (CG)							IG vs. CG
Study Identifier	Intervention	Design	Measurements					t0		t1			t1 vs t0						t0		t1		t1 vs t0		t0		t1 vs t0
			Time points	Instruments and metrics	Outcome measure (grey shaded were selected for data extraction table)	Units of measurement	n	mean	sd	mean	sd	sign. Group effect	within group diff t1-t0	sign. time effect	sign. Time x group	SMD t1-t0 (green: statistically significant)	corrected SMD (Hedge's g)	n	mean	sd	mean	sd	within group diff	sign. time effect	baseline difference?	baseline difference t-statistic	between group difference in t1-t0 (green: statistically significant)	SMD between group difference in t1-t0 (pooled pre sd in denominator)	corrected SMD (Hedge's g)
Lee & Choi 2019	IFM exercise program	RCT	t0: baseline; t1: week 6 t1: 4 weeks	YBT reach distance
Lee & Choi 2019		RCT			YBT composite reach L/R	% leg length	15	66.79	9.64	70.94	8.74		6.1	<0.005	<0.005	0.663765	0.645825	15	65.44	8.67	66.74	9.09	2.3	0.12	No	0.403271	3.8	0.414492
Lynn 2012	Short-foot exercise program	RCT	t0: baseline; t1: week 4 t1: 4 weeks	YBT CoP excursion
Lynn 2012		RCT			YBT mediolateral maximum CoP displacement, dominant stance leg	mm	8	53.4	6.2	49.3	7.1		-4.1	<0.017		-0.616541	-0.582912	8	51.4	5.1	46.7	4.2	-4.7	<0.017	No	0.704634	0.6	0.105695	0.0999299
Lynn 2012		RCT			YBT mediolateral maximum CoP displacement, nondominant stance leg	mm	8	52.4	4.5	43.1	5.1		-9.3	<0.017	<0.05	-1.9375	-1.83182	8	47.8	7.8	48.1	5.5	0.3		No	1.44484	-9.6	-1.50766	-1.42542
Okamura 2020	Short-foot exercise program	RCT	t0: baseline; t1: week 8 t1: 8 weeks	Gait analysis with 3D motion capture system and force plates: GRF in second half of stance phase, stance phase duration, navivular drop spatiotemporal paramaters; ultrasonography: muscle thickness
Okamura 2020		RCT			GRF anterior	% BW	10	24	2	24.8	2.5		0.8			0.355556	0.340532	10	22.6	4.4	23.8	4.7	1.2		No	0.915992	-0.4	-0.117041
Okamura 2020		RCT			GRF medial	% BW	10	6	1.6	5.3	1.3		-0.7	<0.01	<0.05	-0.482759	-0.46236	10	6.2	0.9	6.2	1.3	0		No	-0.34452	-0.7	-0.53926
Okamura 2020		RCT			GRF vertical	% BW	10	109.1	4.5	108.3	5.7		-0.8			-0.156863	-0.150235	10	107.5	6.2	108.4	6.5	0.9		No	0.660447	-1.7	-0.313821
Okamura 2020		RCT			Stance phase duration	ms	10	610.1	36.8	600.4	34.5		-9.7			-0.27209	-0.260593	10	623.6	36.8	618.8	47.1	-4.8		No	-0.820297	-4.9	-0.133152
Okamura 2020		RCT			Time until minimum naviculair hight (dynamic)	% stance	10	74.1	5.4	69.7	8.4		-4.4	<0.01	<0.05	-0.637681	-0.610737	10	74.7	5.2	75	5.5	0.3		No	-0.253095	-4.7	-0.886635
Okamura 2020		RCT			Dynamic navicular drop	mm	10	6.2	1.7	6.2	1.5		0			0	0	10	5.9	2.6	5.4	2.5	-0.5		No	0.305392	0.5	0.227626
Okamura 2020		RCT			AbH thickness	mm	10	12.3	2.4	13.4	3.7		1.1			0.360656	0.345417	10	12.2	1.7	13.2	2.1	1		No	0.107521	0.1	0.0480847
Okamura 2020		RCT			FDB thickness	mm	10	7.3	1	7.1	1.1		-0.2			-0.190476	-0.182428	10	7.7	1.7	7.6	1.6	-0.1		No	-0.641335	-0.1	-0.0717035
Okamura 2020		RCT			FHB thickness	mm	10	13.9	1.6	14	1.3		0.1			0.0689655	0.0660515	10	14.3	1.4	14.7	1.1	0.4		No	-0.594964	-0.3	-0.199557
Taddei 2020	Foot and ankle strengthening training	RCT	t0: baseline; t1: week 8 t1: 8 weeks	Running gait analysis with 3D motion capture system and force plates: MLA ROM, GRF impulse during push-off phase; MRI: muscle CSA and volume; Pressure platform: isometric toe plantar flexion strength
Taddei 2020		RCT			MLA ROM	degrees	14	4.2	2.4	3.6	2.3		-0.6	NR	0.338	-0.255319	-0.247883	14	4.6	2.2	4.6	1.8	0		No	-0.459696	-0.6	-0.260623
Taddei 2020					MLA stiffness	N/cm·kg²/³								NR	0.781
Taddei 2020		RCT			Vertical impulse	BW∙s	14	65.86	7.91	67.85	6.47		1.99	NR	0.021	0.276773	0.268712	14	74.27	6.99	73.49	6.47	-0.78		yes	-2.981	2.77	0.371105
Taddei 2020		RCT			Anteroposterior impulse	BW∙s	14	5.89	1.29	6.33	1.75		0.44	NR	0.315	0.289474	0.281042	14	6.17	1.26	6.14	1.73	-0.03		No	-0.580988	0.47	0.368602
Taddei 2020		RCT			AbDM CSA	mm²	14	105.4	36.1	112.8	31.4		7.4	NR	0.256	0.219259	0.212873	14	119.3	33.7	113.9	31.7	-5.4		No	-1.05313	12.8	0.366546
Taddei 2020		RCT			AbDM volume	cm³	14	9.2	5	11.2	4.8		2	NR	0.013	0.408163	0.396275	14	12.5	4.6	12	4.6	-0.5		No	-1.81738	2.5	0.520382
Taddei 2020		RCT			AbH CSA	mm²	14	135.8	64.4	141.2	58.5		5.4	NR	0.1	0.0878763	0.0853168	14	157.7	79.8	145.2	64.6	-12.5		No	-0.799089	17.9	0.246863
Taddei 2020		RCT			AbH volume	cm³	14	11	6.1	13.7	6.3		2.7	NR	0.019	0.435484	0.4228	14	15.4	8.1	13.3	6.3	-2.1		No	-1.6236	4.8	0.669449
Taddei 2020		RCT			FDB CSA	mm²	14	116.9	45.5	116.7	30.8		-0.2	NR	0.169	-0.00524246	-0.00508977	14	128.3	44.4	122	44.1	-6.3		No	-0.670952	6.1	0.135696
Taddei 2020		RCT			FDB volume	cm³	14	10.4	4.6	12.5	4.7		2.1	NR	0.039	0.451613	0.438459	14	14	4.6	13.3	4.3	-0.7		yes	-2.07059	2.8	0.608696
Taddei 2020		RCT			FHB CSA	mm²	14	143.3	38.9	147.2	42.3		3.9	NR	0.053	0.0960591	0.0932613	14	174.9	37.6	166.2	52.2	-8.7		No/yes	-2.18546	12.6	0.329364
Taddei 2020		RCT			FHB volume	cm³	14	9.1	4.8	10.2	4.4		1.1	NR	0.009	0.23913	0.232165	14	12.6	3.6	12	4.1	-0.6		No/yes	-2.18263	1.7	0.400694
Taddei 2020					Toe plantar flexion strength	%BW	14	19.95	6.24	27.31	9.33		7.36	NR	0.707	0.945408	0.917872	14	23.46	4.86	25.61	7.4	2.15		No	-1.66048	5.21	0.931567
Tudpor 2019	Standard foot exercises + Short-foot exercises	N-RCT	t0: baseline; t1: week 8 t0,5: 4 weeks t1: 8 weeks t2: 12 weeks	SEBT reach distance
Tudpor 2019		N-RCT			SEBT anterolateral reach	% leg length	8	57	5.37401	65.6	10.1823		8.6		NR	1.10566	1.04535	7	55.9	10.3184	57	7.14353	1.1		No	0.253561	7.5	0.932481	0.877629
Tudpor 2019		N-RCT			SEBT anteromedial reach	% leg length	8	61.7	8.48528	67.9	9.05097	<0.05	6.2	<0.05	NR	0.707107	0.668537	7	61.1	5.02693	63.8	8.4664	2.7		No	0.168964	3.5	0.492849	0.463858
Tudpor 2019		N-RCT			SEBT lateral reach	% leg length	8	54.8	5.37401	53.6	9.61665		-1.2		NR	-0.1601	-0.151367	7	59	9.5247	55.6	6.87895	-3.4		No	-1.03178	2.2	0.290326	0.273248
Tudpor 2019		N-RCT			SEBT medial reach	% leg length	8	63.6	8.48528	77	8.76812		13.4	<0.05	NR	1.55332	1.46859	7	63	6.08523	68.2	6.61438	5.2		No	0.158721	8.2	1.09714	1.03261
Tudpor 2019		N-RCT			SEBT posterolateral reach	% leg length	8	53.2	13.2936	60.7	10.4652		7.5		NR	0.631345	0.596908	7	61.2	8.20183	57.3	9.78928	-3.9		No	-1.42089	11.4	1.01477	0.955077
Tudpor 2019		N-RCT			SEBT posteromedial reach	% leg length	8	59.5	8.76812	75.6	9.61665	<0.05	16.1	<0.05	NR	1.75145	1.65592	7	58.2	6.61438	65.1	9.78928	6.9		No	0.326431	9.2	1.17229	1.10333
Kim 2016	Short-foot exercise program	pre-post interventional study	t0: baseline; t1: week 5 t1: 5 weeks	YBT reach distance
Kim 2016		pre-post interventional study			YBT composite reach L/R	% leg length	7	74.3	8.3	82.4	7.4		8.1	<0.05	n/a	1.03185	0.965985
Lee 2019	Short-foot exercise program	pre-post interventional study	t0: baseline; t1: week 8 t1: 8 weeks	Moving platform: center of gravity displacement index score
Lee 2019		pre-post interventional study			Dynamic balance medio-lateral	n/a	15	3.35	1.01	1.49	0.82		-1.86	NR	n/a	-2.03279	-1.97785
Lee 2019		pre-post interventional study			Dynamic balance overall	n/a	15	4.27	1.58	2.15	0.85		-2.12	NR	n/a	-1.74486	-1.6977
Matsumoto 2019	Short-foot exercise program	pre-post interventional study	t0: baseline; t1: week 4 t1: 4 weeks	Gait analysis with 3D motion capture system and pressure plate: MLA compression, gait speed, peak pressure per mask, total plantar contact area
Matsumoto 2019		pre-post interventional study			Peak plantar pressure Lateral heel	N/cm²	20	11.4	2.2	14.3	4.8		2.9	0.02	n/a	0.828571	0.81211
Matsumoto 2019		pre-post interventional study			Peak plantar pressure Medial heel	N/cm²	20	12.4	1.7	16.2	5.9		3.8	0.01	n/a	1	0.980132
Matsumoto 2019		pre-post interventional study			Peak plantar pressure Meta1	N/cm²	20	8.2	2.3	9.9	5.2		1.7	0.15	n/a	0.453333	0.444327
Matsumoto 2019		pre-post interventional study			Peak plantar pressure Meta 2	N/cm²	20	13.5	3.1	15.8	6.1		2.3	0.04	n/a	0.5	0.490066
Matsumoto 2019		pre-post interventional study			Peak plantar pressure Meta3	N/cm²	20	13.5	2.5	15.5	5.9		2	0.06	n/a	0.47619	0.46673
Matsumoto 2019		pre-post interventional study			Peak plantar pressure Meta4	N/cm²	20	9.1	1.9	10.5	2.8		1.4	0.03	n/a	0.595745	0.583909
Matsumoto 2019		pre-post interventional study			Peak plantar pressure Meta5	N/cm²	20	4.3	1.6	5.2	3		0.9	0.07	n/a	0.391304	0.38353
Matsumoto 2019		pre-post interventional study			Peak plantar pressure Midfoot	N/cm²	20	4.4	1.1	5.1	1.8		0.7	0.04	n/a	0.482759	0.473167
Matsumoto 2019		pre-post interventional study			Peak plantar pressure Toe 1	N/cm²	20	6.6	2.2	7.6	3.4		1	0.17	n/a	0.357143	0.350047
Matsumoto 2019		pre-post interventional study			Peak plantar pressure Toes 2-5	N/cm²	20	2.6	1.1	3.3	2		0.7	0.12	n/a	0.451613	0.44264
Matsumoto 2019		pre-post interventional study			Gait speed	m/sec	20	0.33	0.02	0.33	0.04		0	0.25	n/a	0	0
Matsumoto 2019		pre-post interventional study			MLA compression	degrees	20	3.72	6.8	3.65	9.8		-0.07	0.95	n/a	-0.00843373	-0.00826618
Matsumoto 2019		pre-post interventional study			Total plantar contact area	cm²	20	166.5	14.3	161.9	13.1		-4.6	0.01	n/a	-0.335766	-0.329096
Matsumoto 2019		pre-post interventional study			Toe grip strength	kg	20	23.2	8.1	25.2	7.9		2	0.02	n/a	0.25	0.245033
Mulligan 2013	Short-foot exercise program	pre-post interventional study	t0: baseline; t1: week 4 t1: 4 weeks t2: 8 weeks	SEBT reach distance
Mulligan 2013		pre-post interventional study			SEBT anteromedial reach	cm	42	45.7	6	48.2	5.3		2.5	<0.005	n/a	0.442478	0.438418
Mulligan 2013		pre-post interventional study			SEBT medial reach	cm	42	57.8	7.4	61.6	6.6		3.8	<0.005	n/a	0.542857	0.537877
Mulligan 2013		pre-post interventional study			SEBT posteromedial reach	cm	42	71.2	9.2	75.4	8.8		4.2	<0.005	n/a	0.466667	0.462385
Pisal 2020		pre-post interventional study	t0: baseline; t1: week 4 t1: 4 weeks	YBT reach distance
Pisal 2020		pre-post interventional study			Anterior reach (right leg)	?	20	61.27	3.6	66.49	3.4		5.22	<0.0001	n/a	1.49143	1.4618
Pisal 2020		pre-post interventional study			Posteromedial reach (right leg)	?	20	62.2	5.2	66.9	5.1		4.7	<0.0001	n/a	0.912621	0.89449
Pisal 2020		pre-post interventional study			Posterolateral reach (right leg)	?	20	62.19	5.5	66.8	5.13		4.61	<0.0001	n/a	0.867357	0.850124
Pisal 2020		pre-post interventional study			Anterior reach (left leg)	?	20	61.47	5.2	65.64	5		4.17	<0.0001	n/a	0.817647	0.801402
Pisal 2020		pre-post interventional study			Posteromedial reach (left leg)	?	20	60.62	5	65.08	5		4.46	<0.0001	n/a	0.892	0.874278
Pisal 2020		pre-post interventional study			Posterolateral reach (left leg)	?	20	61.1	5.2	65.1	5.08		4	<0.0001	n/a	0.77821	0.762749
Ma 2020		pre-post interventional study	t0: baseline; t1: week 4	YBT reach distance	YBT composite reach affected side	?	14	97	7.48331	96	7.48331		-1	NR	n/a	-0.133631	-0.129738

## Sheet: Quality assessment
Study Id	Reviewer	1. Is the hypothesis/aim/objective of the study clearly described? Yes=1 No=0	2. Are the main outcomes to be measured clearly described in the Introduction or Methods section? Yes=1 No=0	3. Are the characteristics of the patients included in the study clearly described ? Yes=1 No=0	4. Are the interventions of interest clearly de- scribed? Yes=1 No=0	5. Are the distributions ofprincipal confounders in each group of subjects to be compared clearly described? Yes=1 No=0	6. Are the main findings of the study clearly described? Yes=1 No=0	7. Does the study provide estimates of the random variability in the data for the main outcomes? Yes=1 No=0	8. Have all important adverse events that may be a consequence ofthe intervention been reported? Yes=1 No=0	9. Have the characteristics of patients lost to fol0-up been described? Yes=1 No=0	10. Have actual probability values been report- ed(e.g. 0.035 rather than <0.05) for the main outcomes except where the probability value is less than 0.001? Yes=1 No=0	27. Is the sample size calculation reported? Yes=1 No=0	11. Were the subjects asked to participate in the study representative of the entire population from which they were recruited? Yes=1 No=0	12. Were those subjects who were prepared to par- ticipate representative of the entire population from which they were recruited? Yes=1 No=0	13. Were the staff, places, and facilities where the patients were treated, representative of the treatment the majority ofpatients receive? Yes=1 No=0	14. Was an attempt made to blind study subjects to the ntervention they have received ? Yes=1 No=0	15. Was an attempt made to blind those measuring the main outcomes ofthe intervention? Yes=1 No=0	16. If any of the results of the study were based on "data dredging", was this made clear? Yes=1 No=0	17. In trials and cohort studies, do the analyses adjust for different lengths of fol0-up of patients, or in case-control studies, is the time period between the intervention and outcome the same for cases and controls ? Yes=1 No=0	18. Were the statistical tests used to assess the main outcomes appropriate? Yes=1 No=0	19. Was compliance with the intervention/s reliable? Yes=1 No=0	20. Were the main outcome measures used accurate (valid and reliable)? Yes=1 No=0	21. Were the patients in different intervention groups (trials and cohort studies) or were the cases and controls (case-control studies) recruited from the same population? Yes=1 No=0	22. Were study subjects in different intervention groups (trials and cohort studies) or were the cases and controls (case-control studies) recruited over the same period of time? Yes=1 No=0	23. Were study subjects randomised to intervention groups? Yes=1 No=0	24. Was the randomised intervention assignment concealed from both patients and health care staff until recruitment was complete and irrevocable? Yes=1 No=0	25. Was there adequate adjustment for confounding in the analyses from which the main findings were drawn? Yes=1 No=0	26. Were losses of patients to follow-up taken into account? Yes=1 No=0
Lee, Cho, Lee 2019	HB	1	1	1	1	1	1	1	0	1	1	1	0	1	1	0	1	1	1	1	unclear	1	1	1	1	1	1	1
Lee, Cho, Lee 2019	LW	0	1	0	0	1	1	1	0	1	1	1	unclear	unclear	unclear	0	1	1	1	1	unclear	1	unclear	unclear	0	0	1	1		Sample size deter- mination was based on the data of Lynn et al. [26], which re- ported a large effect size of SFE (Cohenâ€™s d, 0.80). The data were transformed to meet the assumptions for repeated mea- sures, with an effect size f(V) of 0.4, and the sample size calcu- lated using G-power (version 3.1; Franz Faul, UniversitÃ¤t Kiel, Germany). For an f(V) of 0.4, with an a error probability level…
Lee, Cho, Lee 2019	Consensus	0	1	0	0	0	1	1	0	1	1	1	unclear	unclear	unclear	0	1	1	1	1	unclear	1	unclear	unclear	0	0	1	1
Lynn 2012	HB	1	unclear	1	1	1	1	1	0	0	1	0	0	0	1	0	0	1	1	1	unclear	1	1	1	1	unclear	unclear	1
Lynn 2012	LW	1	1	1	1	1	1	1	0	1	0	0	unclear	unclear	unclear	0	0	1	1	1	unclear	1	1	1	1	unclear	1	1
Lynn 2012	Consensus	1	1	1	1	1	1	1	0	1	0	0	unclear	unclear	unclear	0	0	1	1	1	unclear	1	1	1	1	unclear	1	1
Okamura 2020	HB	1	1	1	1	1	1	1	unclear	1	1	1	unclear	unclear	1	0	1	1	1	unclear	1	1	1	1	1	1	unclear	1		before and after the intervention. <b>2.6. Sample size A paired t-test power analysis of exercise inï¬‚uence determined that at least 15 participants were required to obtain a power of 0.8 at a two- sided level of 0.05 with and eï¬€ect size (d) of 0.8. Analysis was per- formed using the G Power 3.1 analysis program (DÃ¼sseldorf,</b> Germany) [26]. 2.7. Randomization and
Okamura 2020	LW	1	1	1	1	1	1	1	0	1	0	1	unclear	unclear	0	0	1	1	1	1	1	1	1	1	1	unclear	1	1		paired t-test power analysis of exercise inï¬‚uence determined that at least 15 participants were required to obtain a power of 0.8 at a two- sided level of 0.05 with and eï¬€ect size (d) of 0.8. Analysis was per- formed using the G Power 3.1 analysis program (DÃ¼sseldorf, Germany) [26].
Okamura 2020	Consensus	1	1	1	1	1	1	1	0	1	1	1	unclear	unclear	unclear	0	1	1	1	1	1	1	1	1	1	unclear	1	1
Mulligan 2013	Consensus	1	1	1	1	unclear	1	1	0	1	1	0	unclear	unclear	unclear	0	0	1	1	1	1	1	unclear	unclear	0	0	unclear	1
Mulligan 2013	HB	1	1	1	1	1	1	1	0	0	1	0	unclear	unclear	unclear	unclear	unclear	1	1	1	unclear	1	unclear	unclear	unclear	unclear	unclear	0
Mulligan 2013	LW	1	1	1	1	unclear	1	1	0	1	1	0	unclear	unclear	unclear	0	1	1	1	1	1	1	unclear	unclear	0	0	1	1
Taddei 2020	Consensus	1	1	1	1	1	1	1	0	1	1	0	unclear	unclear	unclear	0	1	1	1	1	1	1	1	1	1	1	1	1
Taddei 2020	HB	1	1	1	1	1	1	1	0	0	1	0	unclear	unclear	1	0	1	1	1	1	1	1	1	1	1	1	unclear	0			Proof of concept studie.
Taddei 2020	LW	1	1	1	1	1	1	1	0	1	1	0	unclear	unclear	unclear	0	1	1	1	1	1	1	1	1	1	1	1	1
Kukiat 2019	HB	unclear	0	1	0	1	1	1	unclear	0	0	0	unclear	unclear	unclear	0	unclear	1	1	1	unclear	unclear	1	1	unclear	unclear	0	0
Kukiat 2019	LW	1	1	1	0	1	1	1	0	0	0	0	unclear	unclear	unclear	0	unclear	1	1	1	unclear	unclear	1	unclear	unclear	0	unclear	0
Kukiat 2019	Consensus	1	1	1	0	1	1	1	0	0	0	0	unclear	unclear	unclear	0	unclear	1	1	1	unclear	unclear	1	unclear	0	0	unclear	0
Kim 2016	HB	unclear	1	1	1	unclear	1	1	0	unclear	0	0	0	0	1	0	unclear	1	unclear		unclear	1	1	1	1	unclear	0	unclear
Kim 2016	LW	0	1	1	0	0	0	0	0	unclear	0	0	unclear	unclear	unclear	0	0	1	unclear	1	unclear	1	0	0	0	0	unclear	unclear
Kim 2016	Consensus	0	1	1	0	0	0	1	0	0	0	0	unclear	unclear	unclear	0	0	1	unclear	1	unclear	1	unclear	unclear	0	0	unclear	unclear
Lee 2019	Consensus	1	1	1	0	0	1	1	0	0	1	0	unclear	unclear	unclear	0	0	1	1	0	unclear	1	1	1	1	0	unclear	unclear
Lee 2019	HB	1	1	1	1	1	1	1	0	unclear	1	0	unclear	unclear	0	0	unclear	1	1	1	1	1	1	1	1	unclear	unclear	0
Lee 2019	LW	1	1	1	0	0	1	1	0	unclear	1	0	unclear	unclear	unclear	0	0	1	1	0	unclear	1	unclear	1	1	0	unclear	unclear
Matsumoto 2019	HB	unclear	0	1	1	0	1	1	0	0	1	0	unclear	unclear	1	unclear		1	1	1	0	1	unclear	unclear	unclear	unclear	unclear	0
Matsumoto 2019	LW	1	1	1	0	unclear	1	1	0	0	1	0	unclear	unclear	unclear	0	0	1	unclear	1	unclear	1	unclear	unclear	unclear	unclear	unclear	unclear
Matsumoto 2019	Consensus	0	1	1	0	0	1	1	0	0	1	0	unclear	unclear	unclear	0	0	1	unclear	1	unclear	1	unclear	unclear	unclear	unclear	unclear	unclear
Pisal 2020	Consensus	0	0	0	0	0	1	1	0	0	1	1	unclear	unclear	unclear	0	0	1	unclear	unclear	0	1	unclear	unclear	0	0	unclear	unclear
Ma 2020	LW	1	1	1	1	unclear	0	1	1	1	1	1	unclear	unclear	unclear	0	unclear	1	unclear	1	unclear	1	unclear	unclear	unclear	unclear	unclear	1
Ma 2020	HB	1	1	1	1	unclear	1	1	1	1	1	1	unclear	unclear	0	1	unclear	1	unclear	1	1	1	unclear	unclear	unclear	unclear	unclear	1
Ma 2020	Consensus	1	1	1	1	unclear	0	1	1	1	1	1	unclear	unclear	0	0	unclear	1	unclear	1	unclear	1	unclear	unclear	unclear	unclear	unclear	1

## Sheet: Abbreviations
IFM	Intrinsic foot muscles
RCT	Randomized controlled trial
N-RCT	Non-randomized controlled trial
IG	Intervention group
CG	Control group
YBT	Y-balance test
SEBT	Star excursion balance test
CoP	Center of pressure
L	Left
R	Right
GRF	Ground reaction force
BW	Body weight
MLA	Medial Longitudinal Arch
ROM	Range of motion
3D	3-dimensional
SMD	Standardized mean difference
